# Supplementary material for: Study on the luminescence properties of ionic [Cu(N^N)(P^P)]+ complexes: influence of ligands, counteranions and weak interactions
Source: Royal Society of Chemistry journal article supplement (doi:10.1039/d2ce01177h), 2022-01-01
Supplement: d2ce01177h1.pdf [file d2ce01177h1.pdf]

# Supporting information

## Study on the influence conditions of luminescence properties of ionic

### $[\text{Cu}(\text{N}^{\wedge}\text{N})(\text{P}^{\wedge}\text{P})]^+$ complexes: ligands, counteranions and weak interactions

Zi-Xi Li,<sup>†a</sup> Zhen-Zhou Sun,<sup>†a</sup> Guo Wang,<sup>a</sup> Wei Yang,<sup>b</sup> Hong-Liang Han,<sup>a</sup> Yu-Ping Yang,<sup>c</sup> Zhong-Feng Li,<sup>a</sup> Lixiong Dai,<sup>\*d,e</sup> Yi-shan Yao<sup>\*f</sup> and Qiong-Hua Jin<sup>\*a,g</sup>

<sup>a</sup>Department of Chemistry, Capital Normal University, Beijing 100048, China. E-mail: [jinqh@cnu.edu.cn](mailto:jinqh@cnu.edu.cn)

<sup>b</sup>Faculty of Food Science and Technology, Suzhou Polytechnical Institute of Agriculture, Suzhou 215008, P. R. China.

<sup>c</sup>School of Science, Minzu University of China, Beijing 100081, China.

<sup>d</sup>Wenzhou Institute, University of Chinese Academy of Sciences, Wenzhou, Zhejiang 325000, China, email: [dailx@ucas.ac.cn](mailto:dailx@ucas.ac.cn)

<sup>e</sup>Oujiang Laboratory, Wenzhou, Zhejiang 325000, China

<sup>f</sup>State Key Laboratory of Toxicology and Medical Countermeasures, Beijing Institute of pharmacology and Toxicology, No. 27 Taiping Road, Haidian District, Beijing, 100850, P. R. China.

<sup>g</sup>State Key Laboratory of Structural Chemistry, Fujian Institute of Research on the Structure of Matter, Chinese Academy of Sciences, Fuzhou, Fujian 350002, China.

‡Zi-Xi Li and Zhen-Zhou Sun contributed equally to this work.

†Electronic Supplementary Information (ESI) available: crystal structure information, spectra data and computation details. CCDC: 2091103-2091105, 2091107-2091108, 2174893-2174925.

## Caption of Figure

**Fig. S1** The IR spectra for complex **1a**.

**Fig. S2** The IR spectra for complex **2a**.

**Fig. S3** The IR spectra for complex **3a**.

**Fig. S4** The IR spectra for complex **4a**.

**Fig. S5** The IR spectra for complex **1b**.

**Fig. S6** The IR spectra for complex **2b**.

**Fig. S7** The IR spectra for complex **3b**.

**Fig. S8** The IR spectra for complex **4b**.

**Fig. S9** The <sup>1</sup>H NMR spectra for complex **1a**.

**Fig. S10** The <sup>1</sup>H NMR spectra for complex **2a**.

**Fig. S11** The <sup>1</sup>H NMR spectra for complex **3a**.

**Fig. S12** The <sup>1</sup>H NMR spectra for complex **4a**.

**Fig. S13** The <sup>1</sup>H NMR spectra for complex **1b**.

**Fig. S14** The <sup>1</sup>H NMR spectra for complex **2b**.

**Fig. S15** The <sup>1</sup>H NMR spectra for complex **3b**.

**Fig. S16** The <sup>1</sup>H NMR spectra for complex **4b**.

**Fig. S17** The <sup>31</sup>P NMR spectra for complex **1a**.

**Fig. S18** The <sup>31</sup>P NMR spectra for complex **2a**.

**Fig. S19** The <sup>31</sup>P NMR spectra for complex **3a**.

**Fig. S20** The  $^{31}\text{P}$  NMR spectra for complex **4a**.  
**Fig. S21** The  $^{31}\text{P}$  NMR spectra for complex **1b**.  
**Fig. S22** The  $^{31}\text{P}$  NMR spectra for complex **2b**.  
**Fig. S23** The  $^{31}\text{P}$  NMR spectra for complex **3b**.  
**Fig. S24** The  $^{31}\text{P}$  NMR spectra for complex **4b**.  
**Fig. S25** The PXRD patterns for complex **1a**: simulated from single crystal data (Black) and single phase polycrystalline sample (Red).  
**Fig. S26** The PXRD patterns for complex **2a**: simulated from single crystal data (Black) and single phase polycrystalline sample (Red).  
**Fig. S27** The PXRD patterns for complex **3a**: simulated from single crystal data (Black) and single phase polycrystalline sample (Red).  
**Fig. S28** The PXRD patterns for complex **4a**: simulated from single crystal data (Black) and single phase polycrystalline sample (Red).  
**Fig. S29** The PXRD patterns for complex **1b**: simulated from single crystal data (Black) and single phase polycrystalline sample (Red).  
**Fig. S30** The PXRD patterns for complex **2b**: simulated from single crystal data (Black) and single phase polycrystalline sample (Red).  
**Fig. S31** The PXRD patterns for complex **3b**: simulated from single crystal data (Black) and single phase polycrystalline sample (Red).  
**Fig. S32** The PXRD patterns for complex **4b**: simulated from single crystal data (Black) and single phase polycrystalline sample (Red).  
**Fig. S33** The thermal stability curves for complexes **1a-4a** and **1b-4b**.

## Caption of Table

**Table. S1** Selected bond lengths ( $\text{\AA}$ ) and angles ( $^\circ$ ) for complexes **1a-4a** and **1b-4b**.

**Table. S2** Intermolecular weak interactions for complexes **1a-4a** and **1b-4b**.

**Table. S3** Fluorescence data for ligands phen, Dpq and bdppmapy.

**Table. S4** Energy, oscillator strength and major contribution of the calculated transitions for complexes **3a** and **3b**.

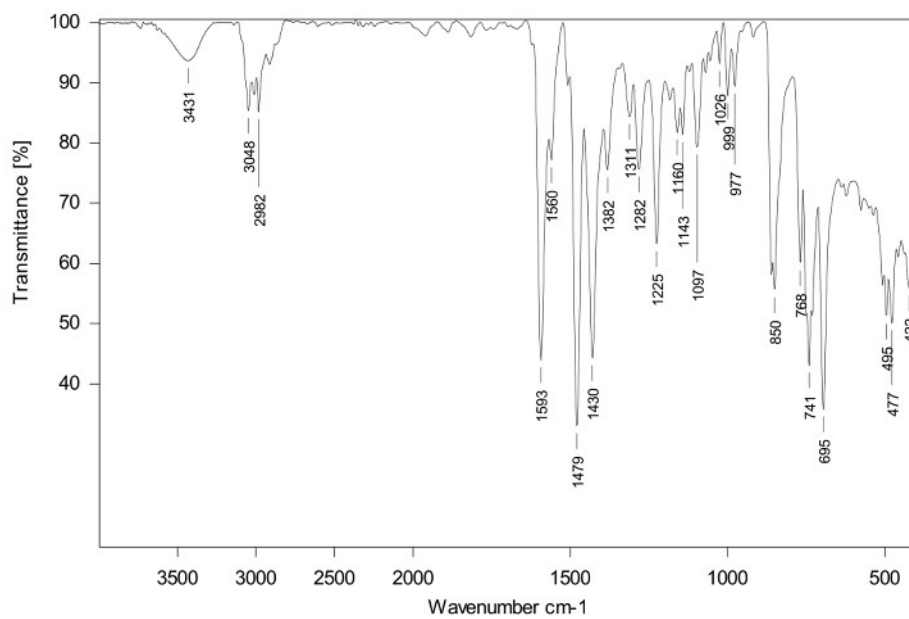

**Fig. S1** The IR spectra for complex 1a.

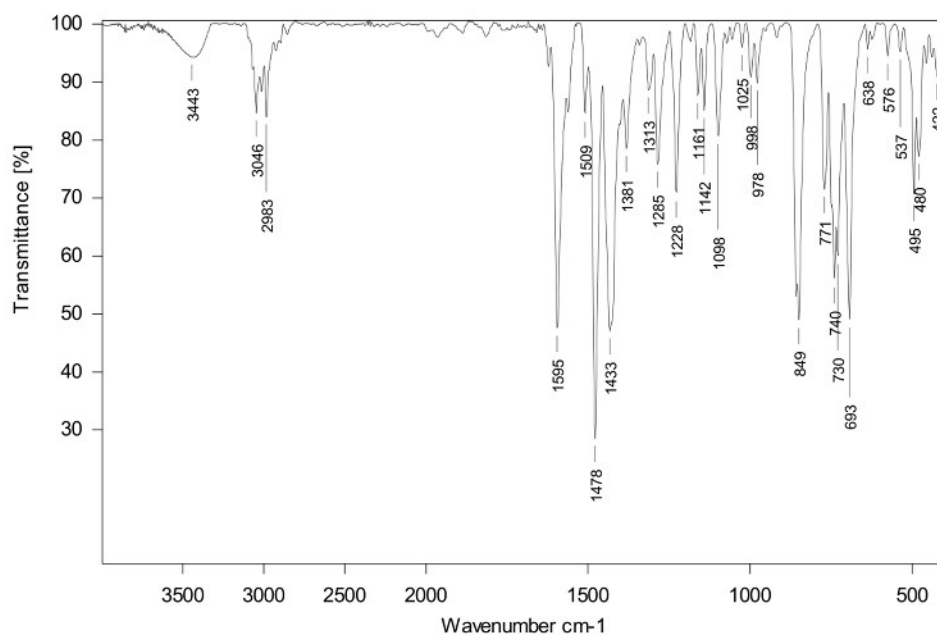

**Fig. S2** The IR spectra for complex 2a.

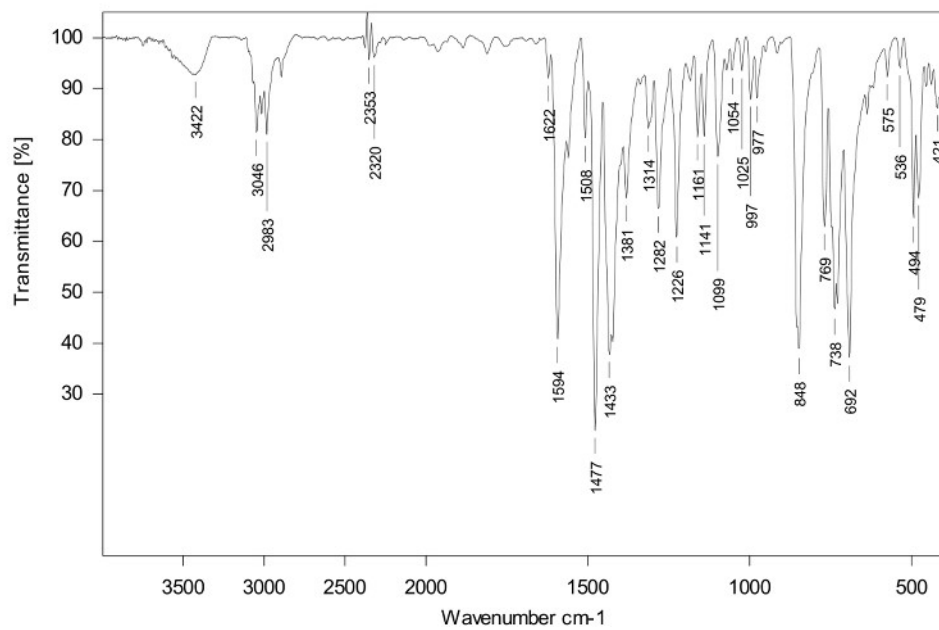

**Fig. S3** The IR spectra for complex **3a**.

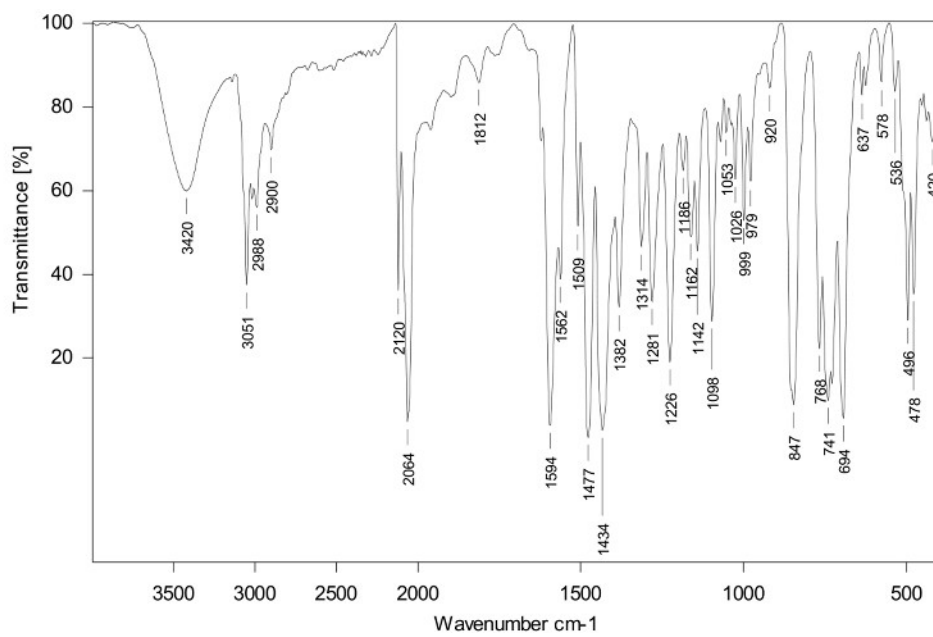

**Fig. S4** The IR spectra for complex **4a**.

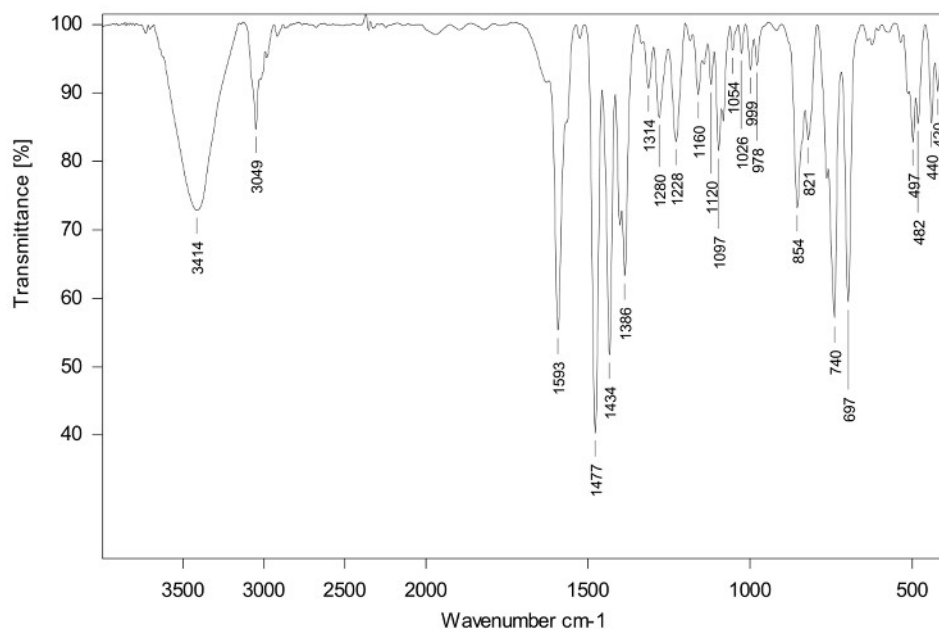

**Fig. S5** The IR spectra for complex **1b**.

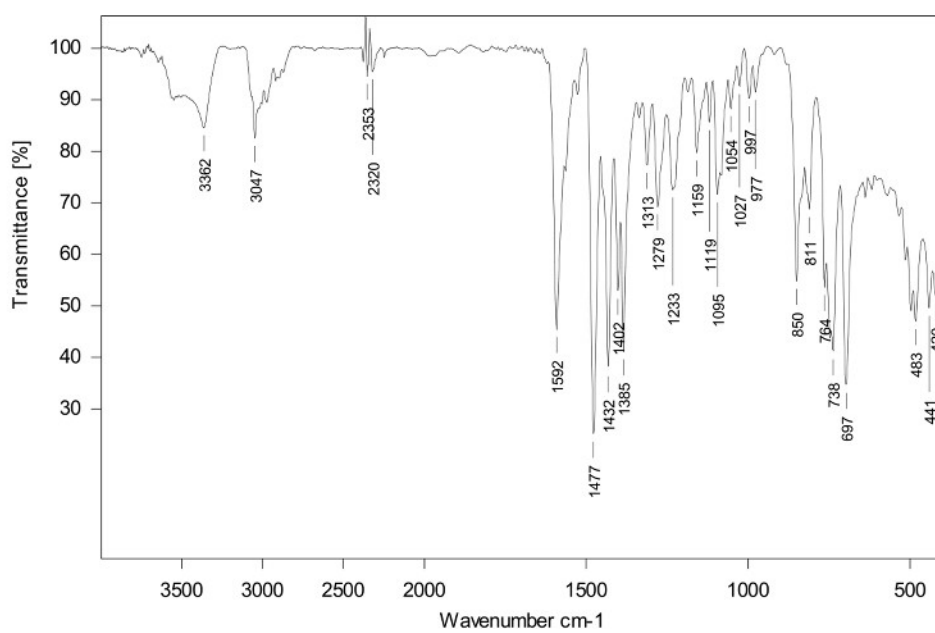

**Fig. S6** The IR spectra for complex **2b**.

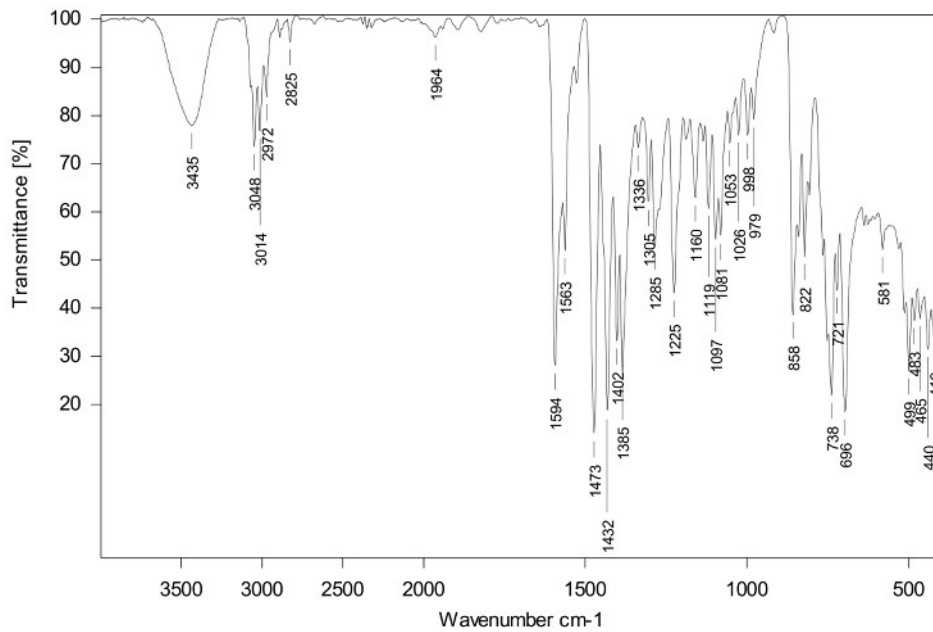

**Fig. S7** The IR spectra for complex **3b**.

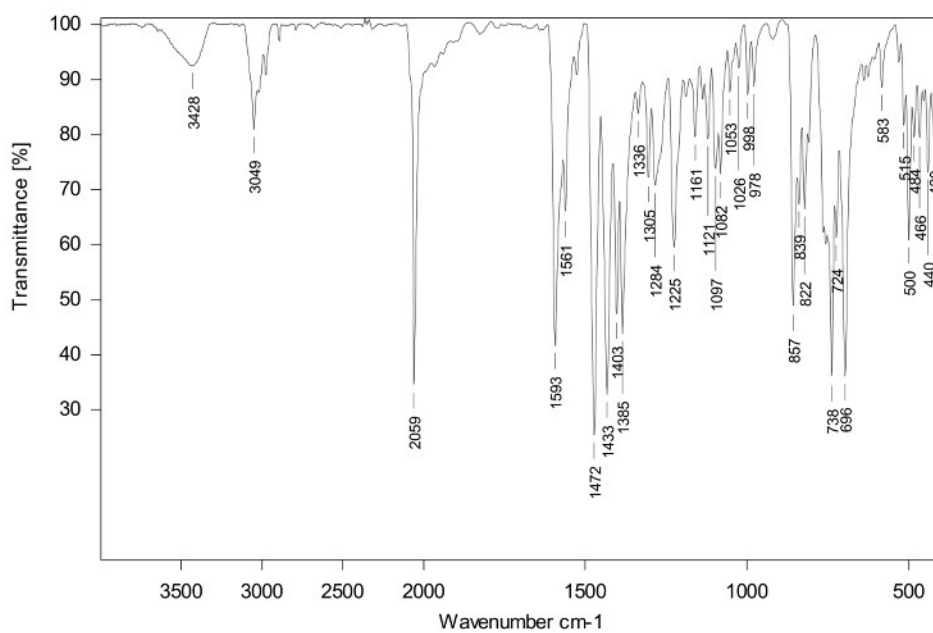

**Fig. S8** The IR spectra for complex **4b**.

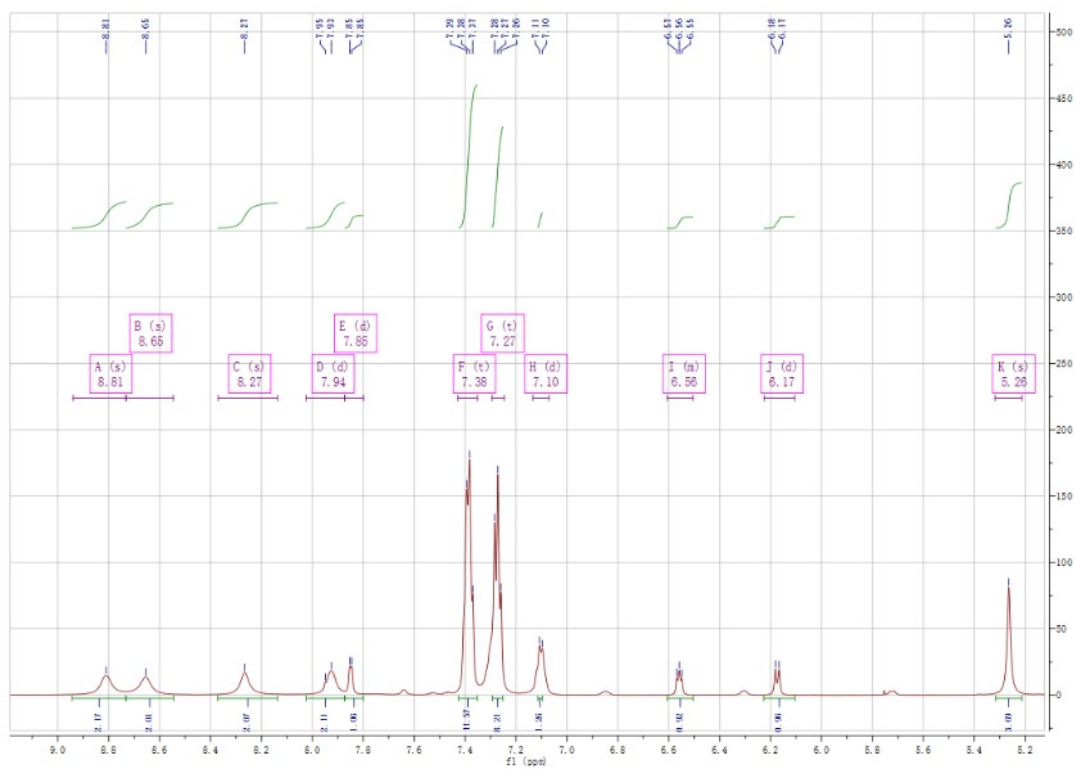

**Fig. S9** The  $^1\text{H}$  NMR spectra for complex **1a**.

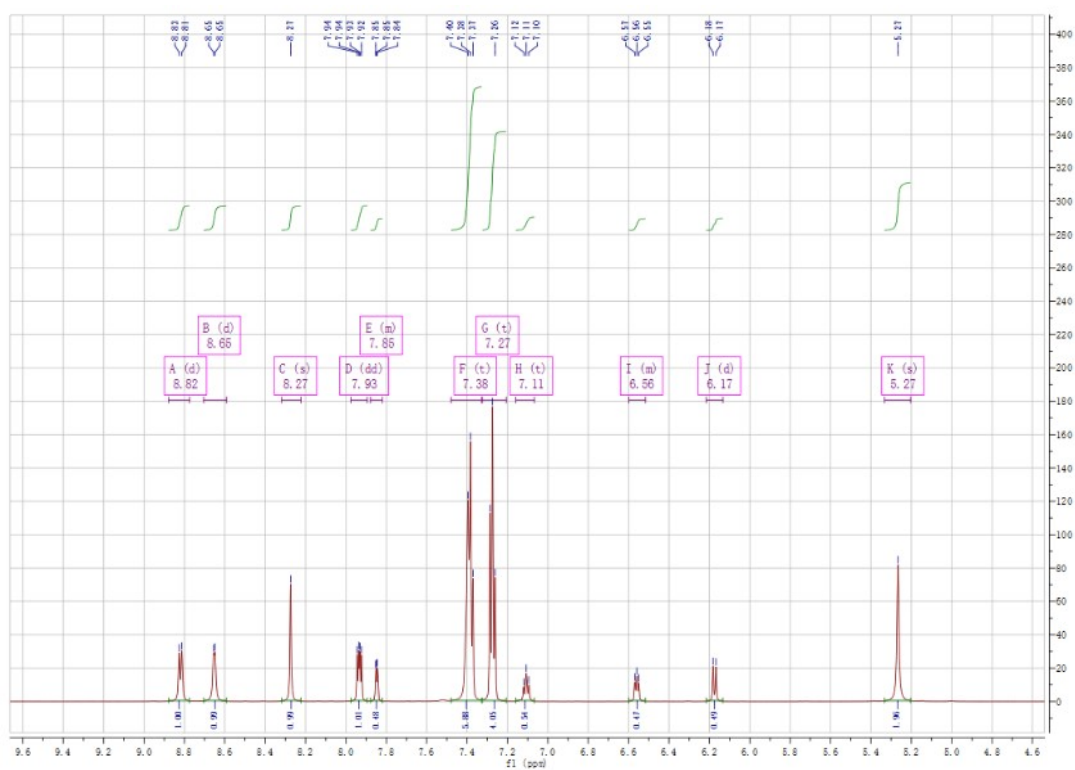

**Fig. S10** The  $^1\text{H}$  NMR spectra for complex **2a**.

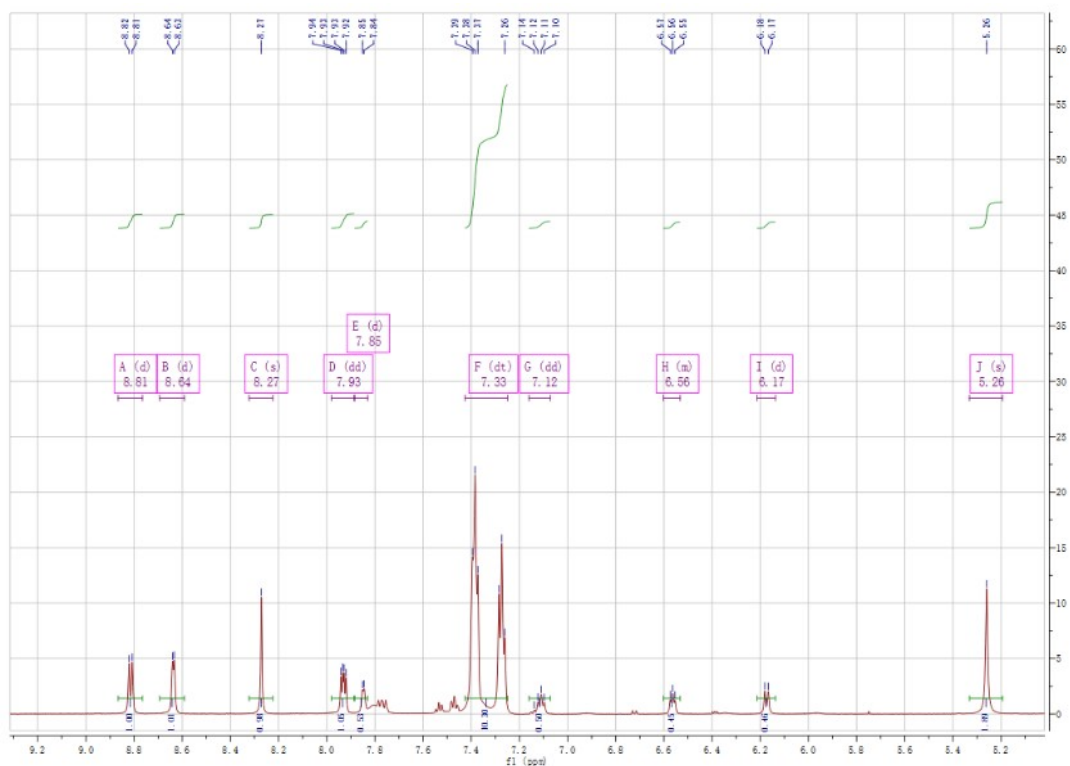

Fig. S11 The  $^1\text{H}$  NMR spectra for complex 3a.

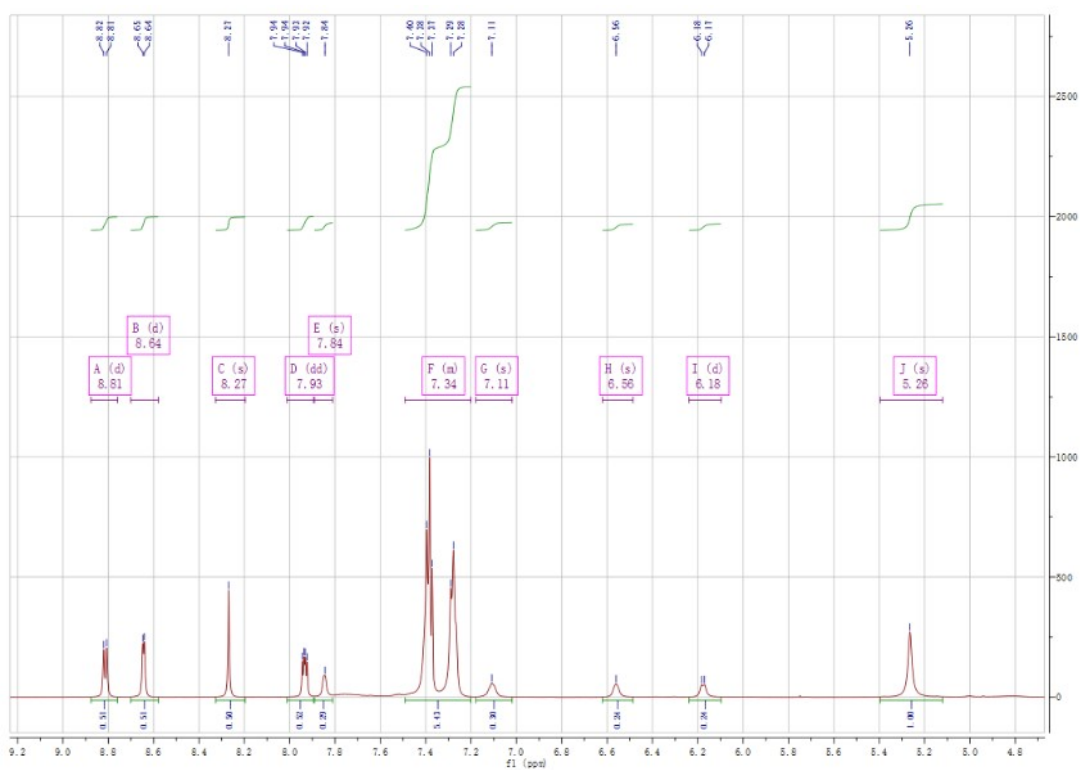

Fig. S12 The  $^1\text{H}$  NMR spectra for complex 4a.



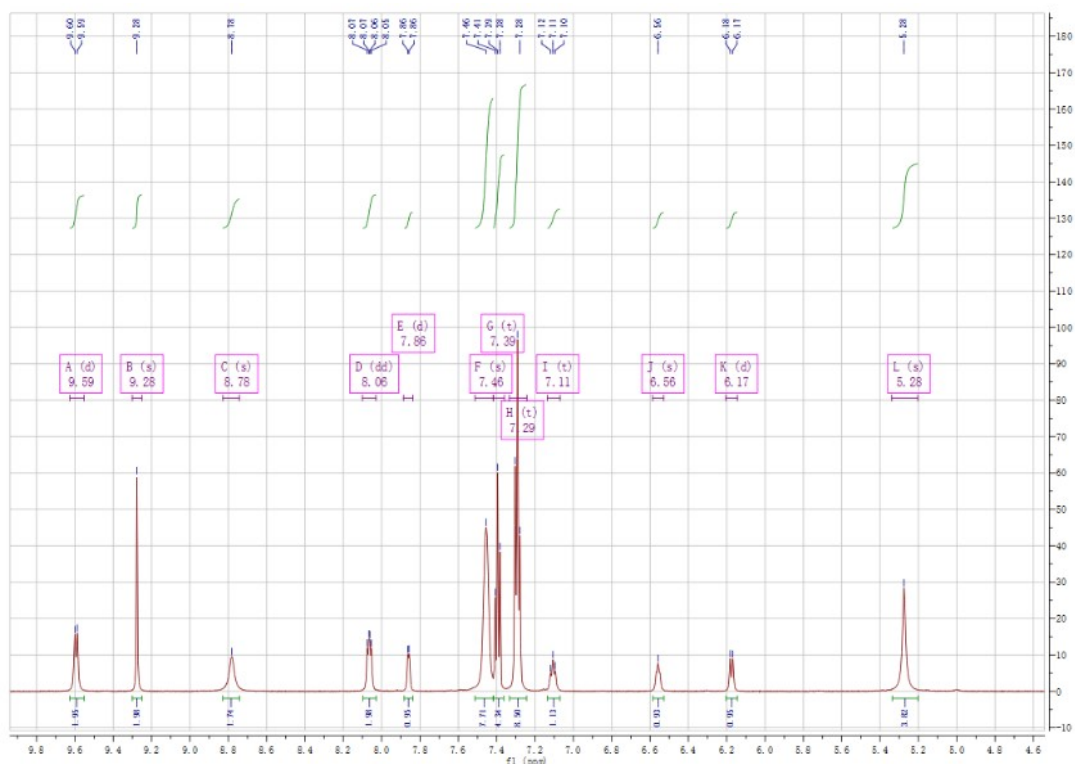

Fig. S13 The  $^1\text{H}$  NMR spectra for complex 1b.

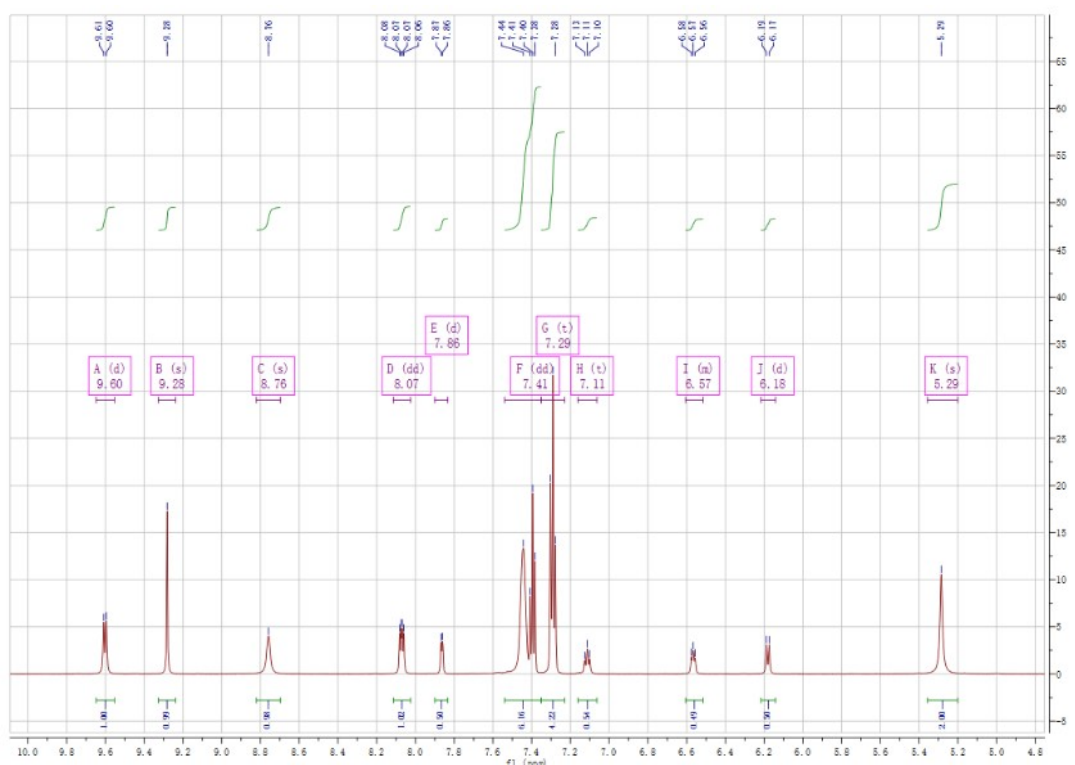

Fig. S14 The  $^1\text{H}$  NMR spectra for complex 2b.

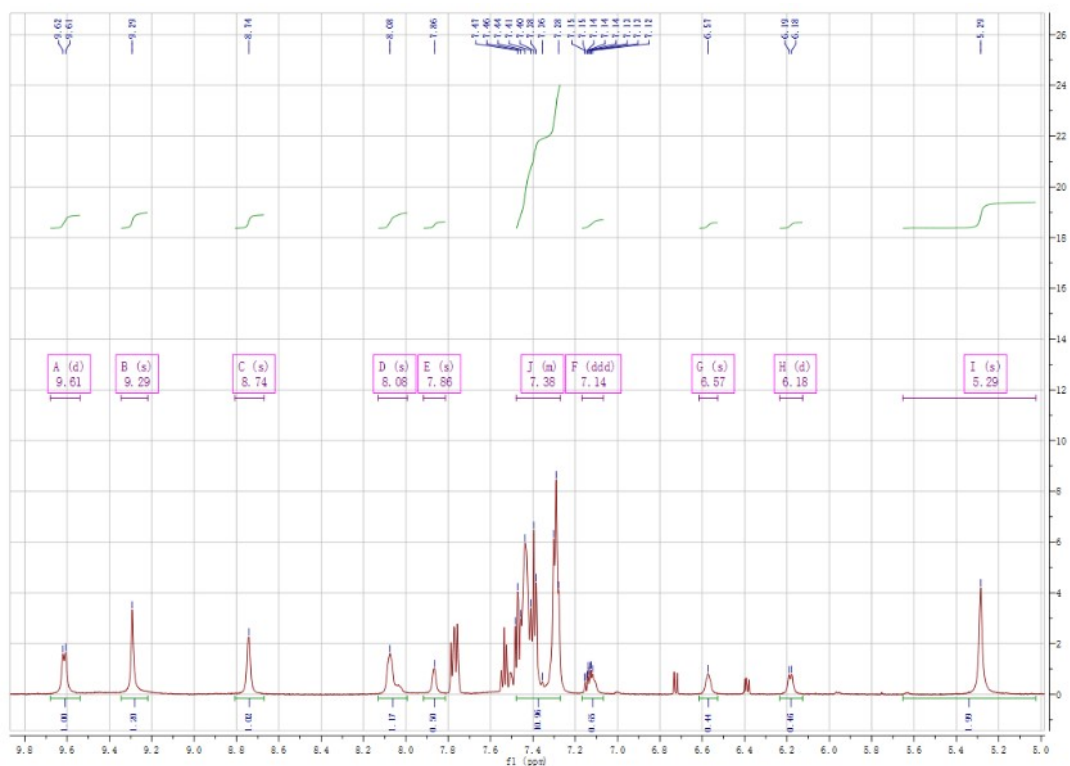

**Fig. S15** The  $^1\text{H}$  NMR spectra for complex **3b**.

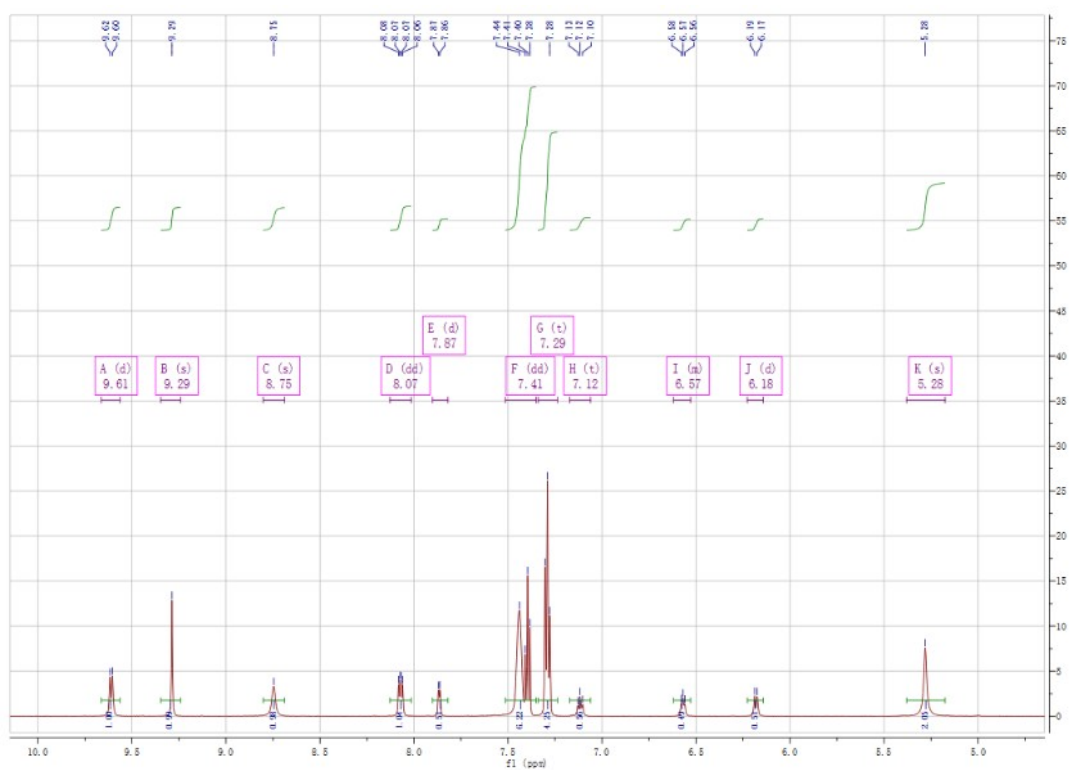

**Fig. S16** The  $^1\text{H}$  NMR spectra for complex **4b**.

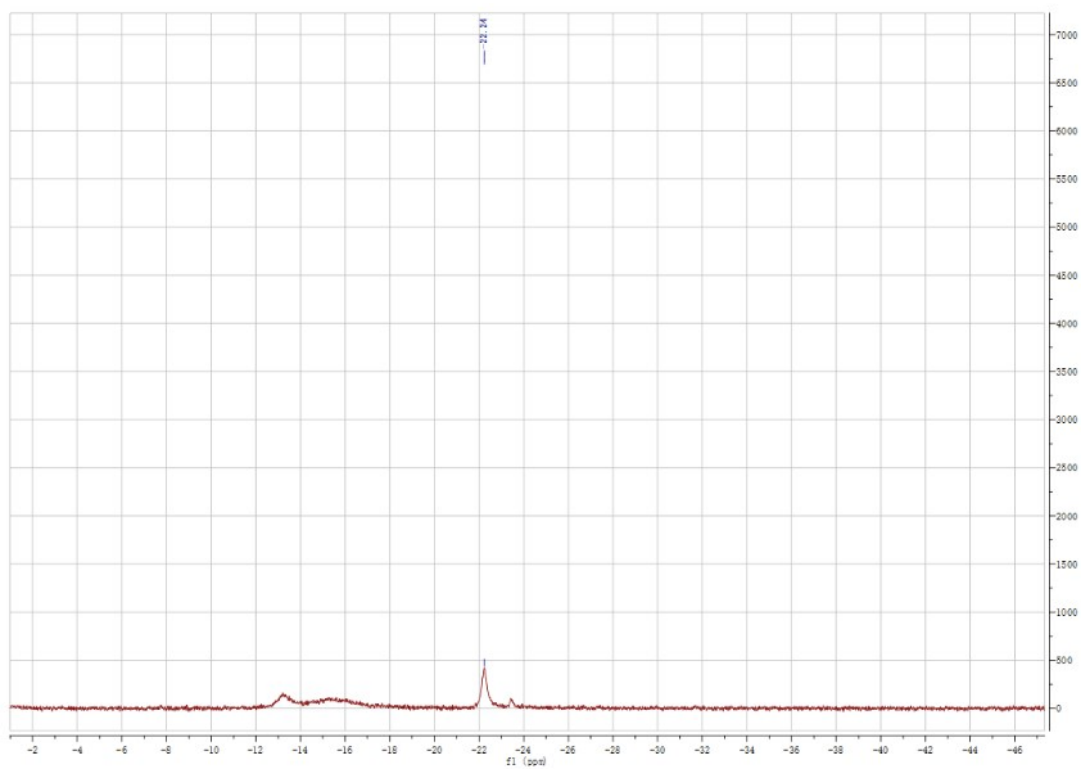

**Fig. S17** The  $^{31}\text{P}$  NMR spectra for complex **1a**.

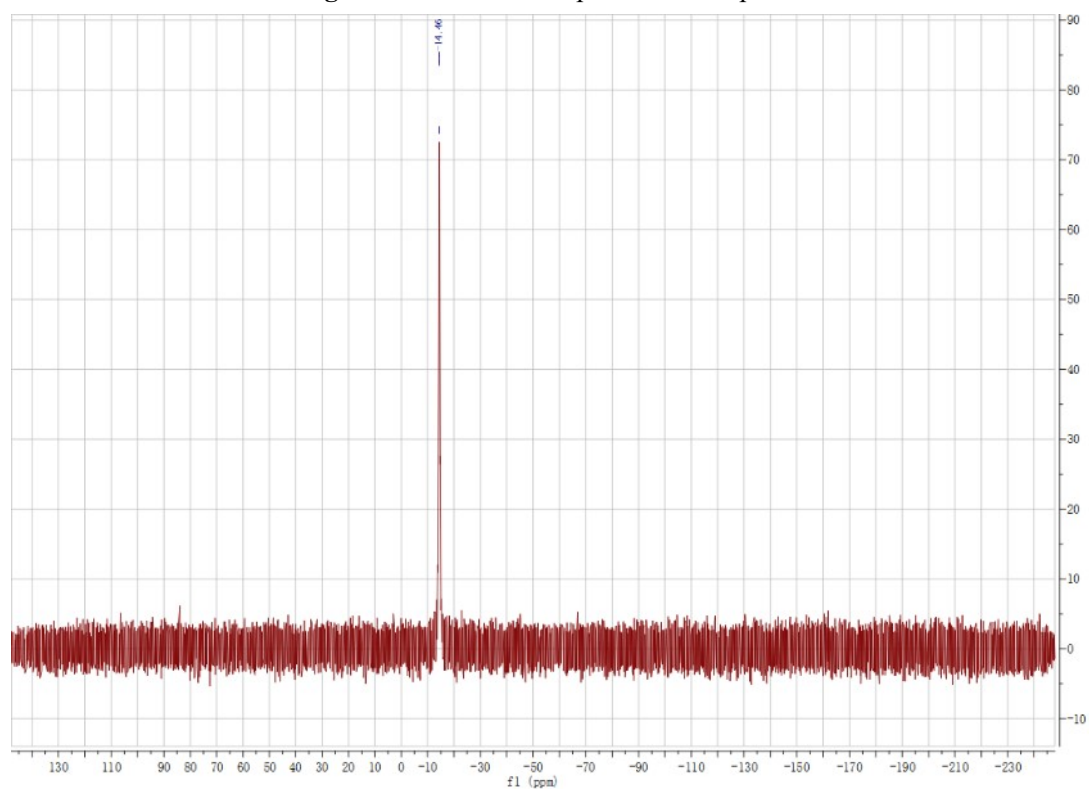

**Fig. S18** The  $^{31}\text{P}$  NMR spectra for complex **2a**.

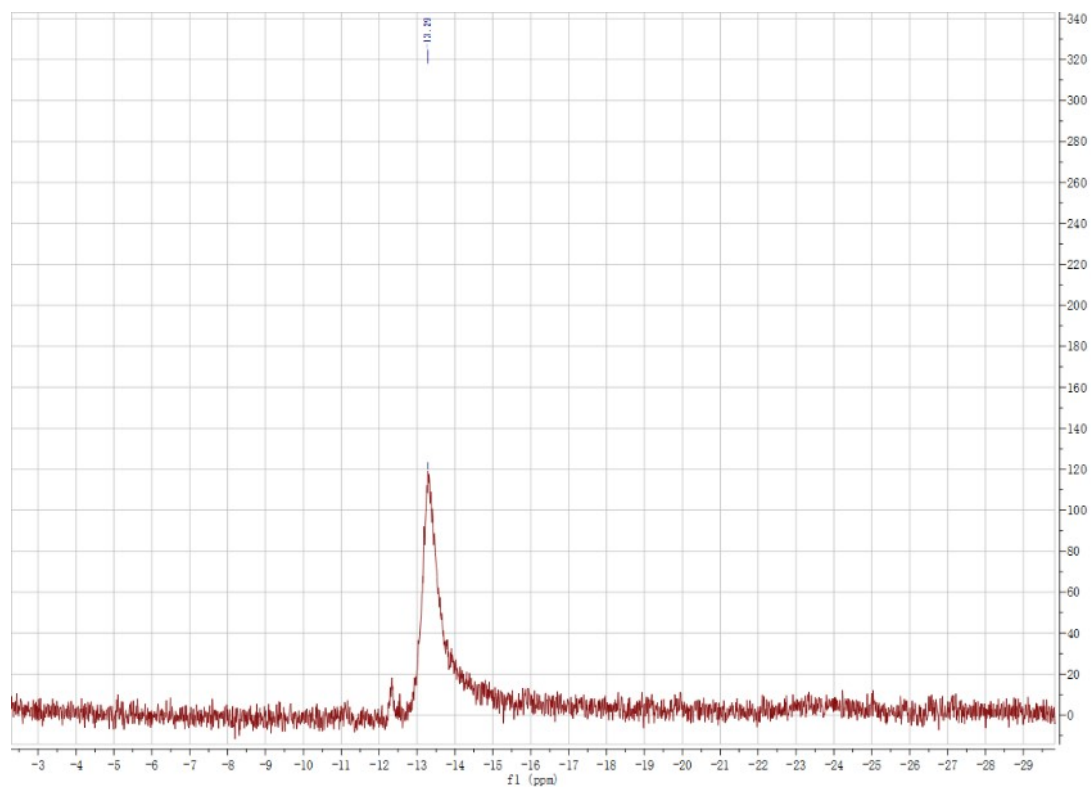

**Fig. S19** The  $^{31}\text{P}$  NMR spectra for complex **3a**.

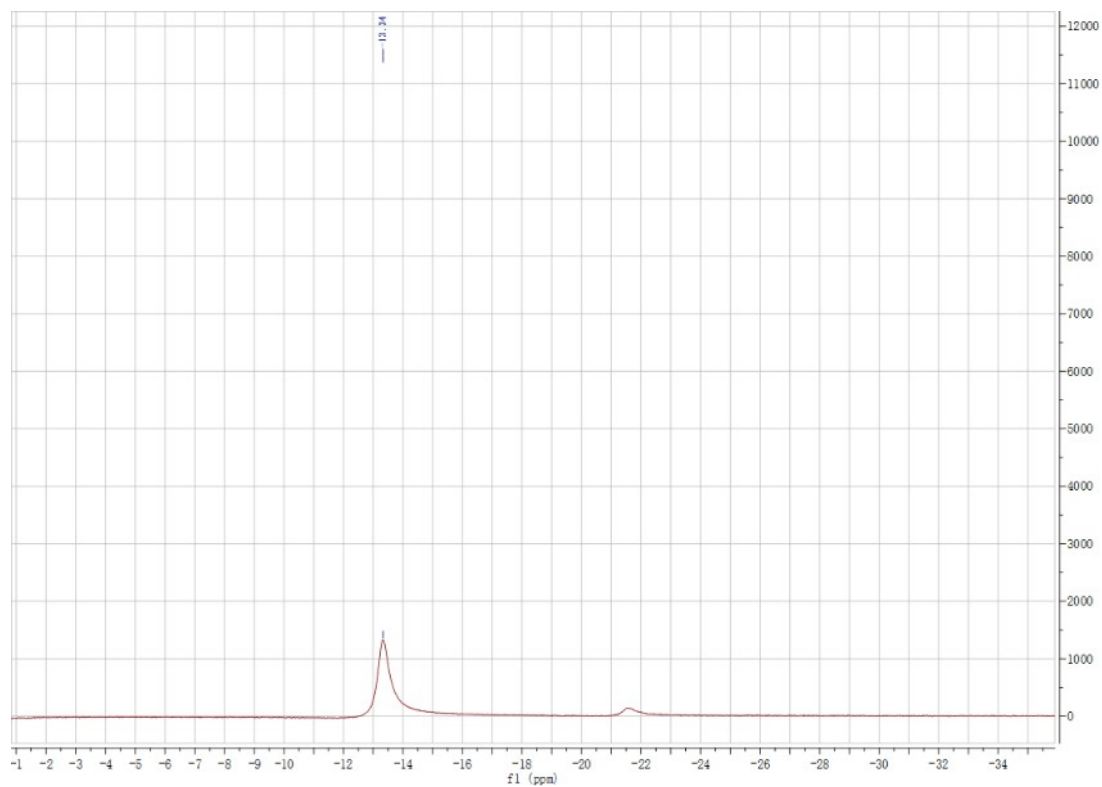

**Fig. S20** The  $^{31}\text{P}$  NMR spectra for complex **4a**.

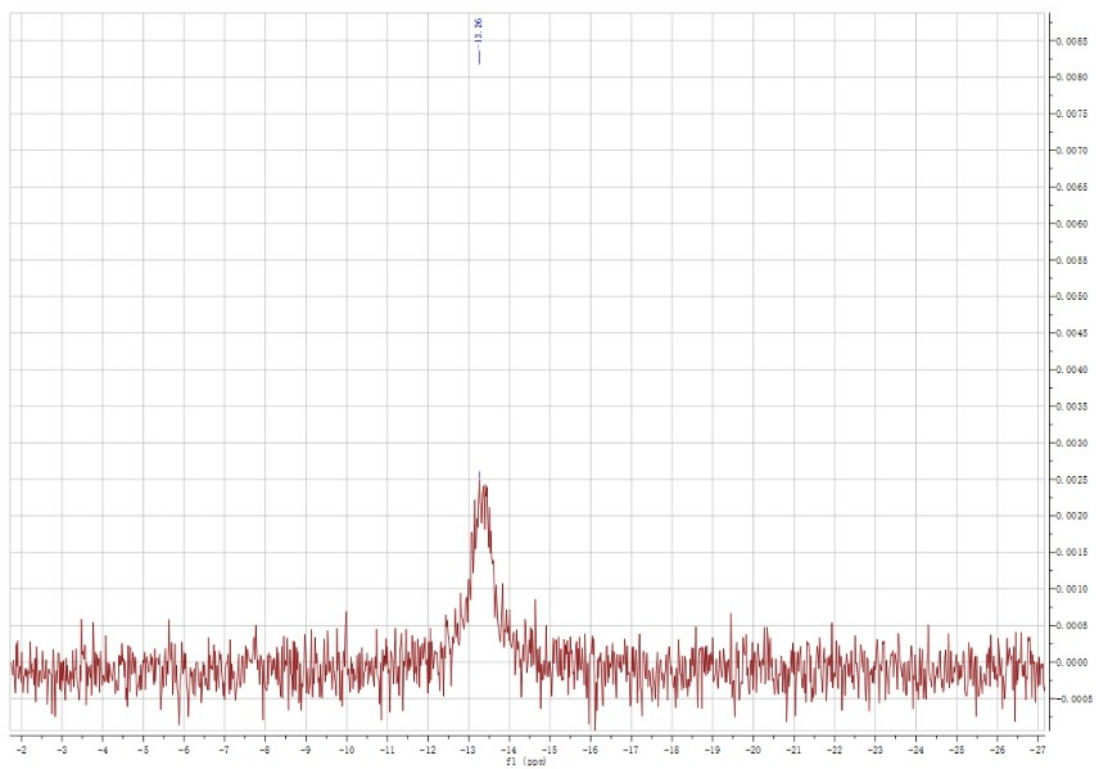

**Fig. S21** The  $^{31}\text{P}$  NMR spectra for complex **1b**.

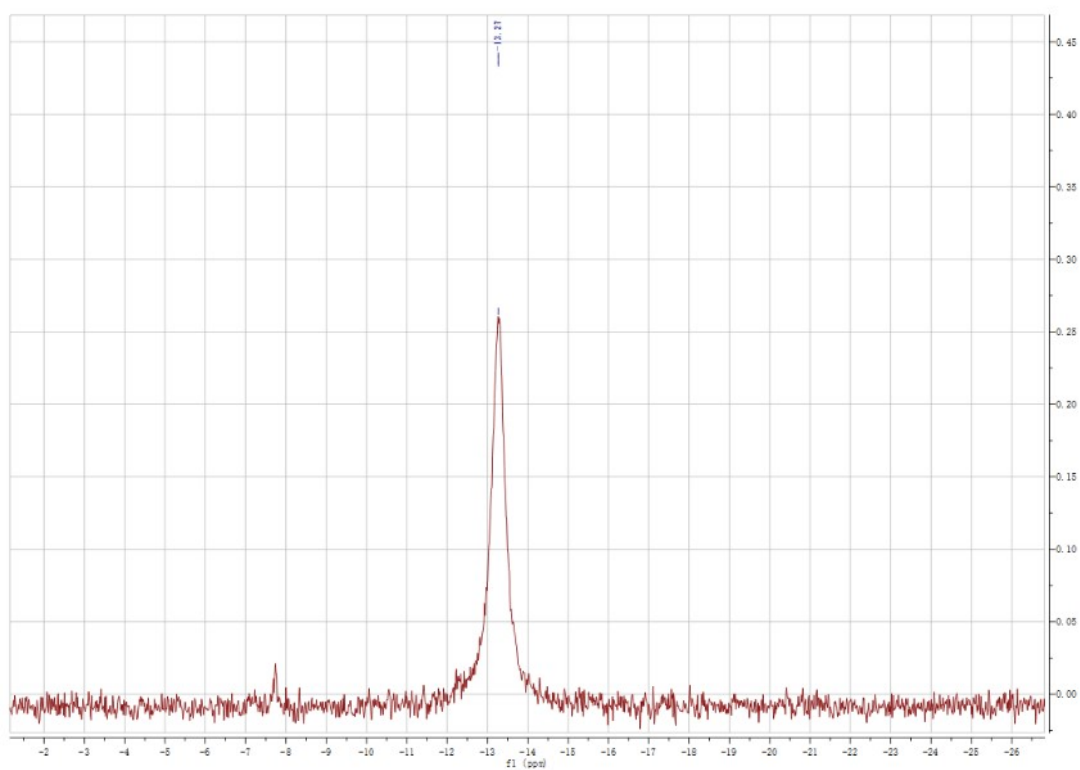

**Fig. S22** The  $^{31}\text{P}$  NMR spectra for complex **2b**.

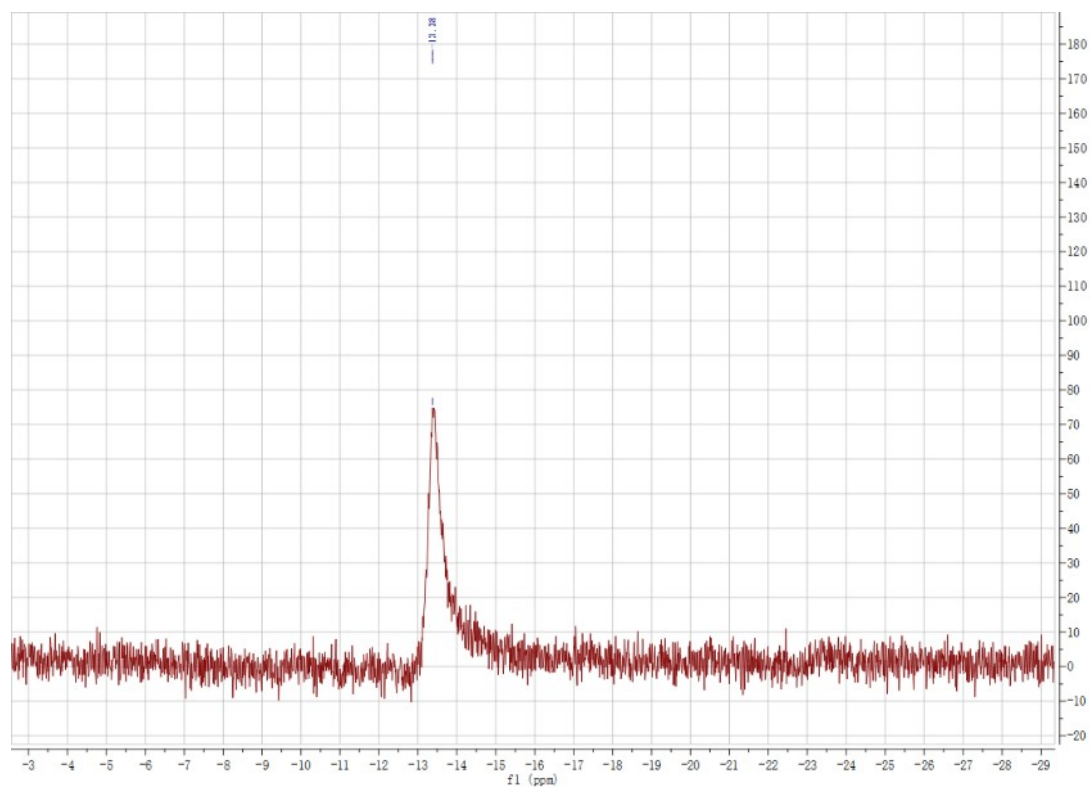

**Fig. S23** The  $^{31}\text{P}$  NMR spectra for complex **3b**.

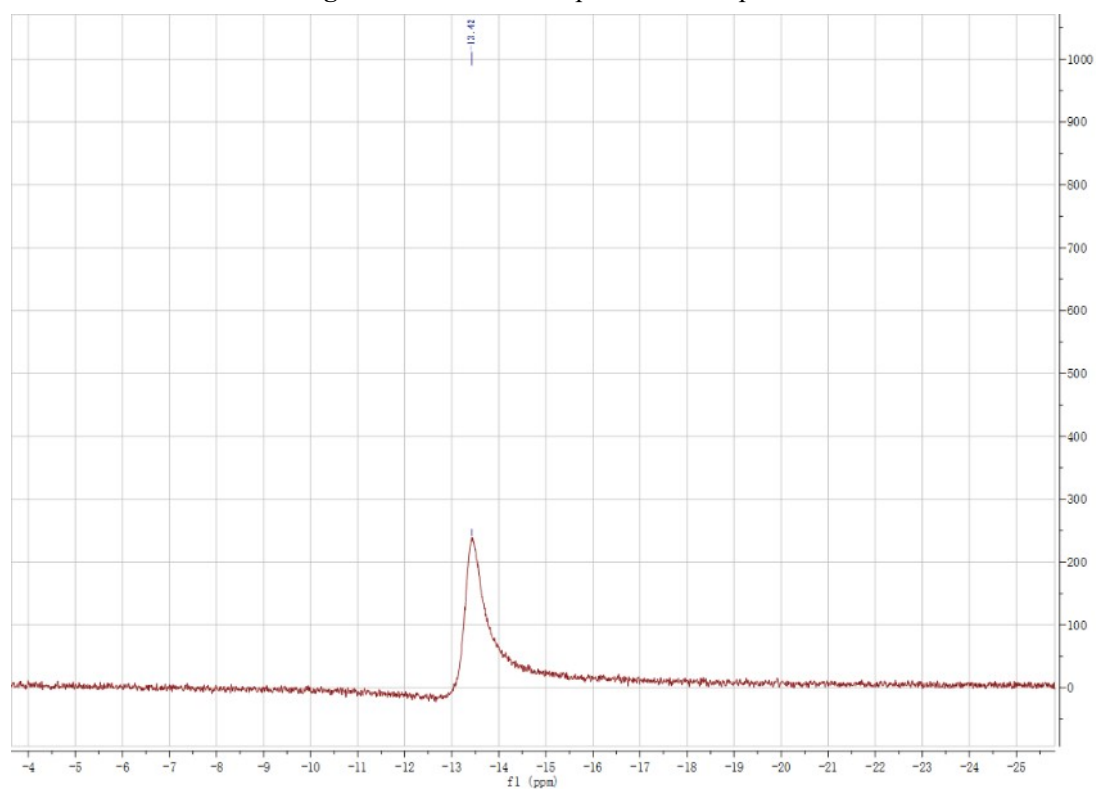

**Fig. S24** The  $^{31}\text{P}$  NMR spectra for complex **4b**.

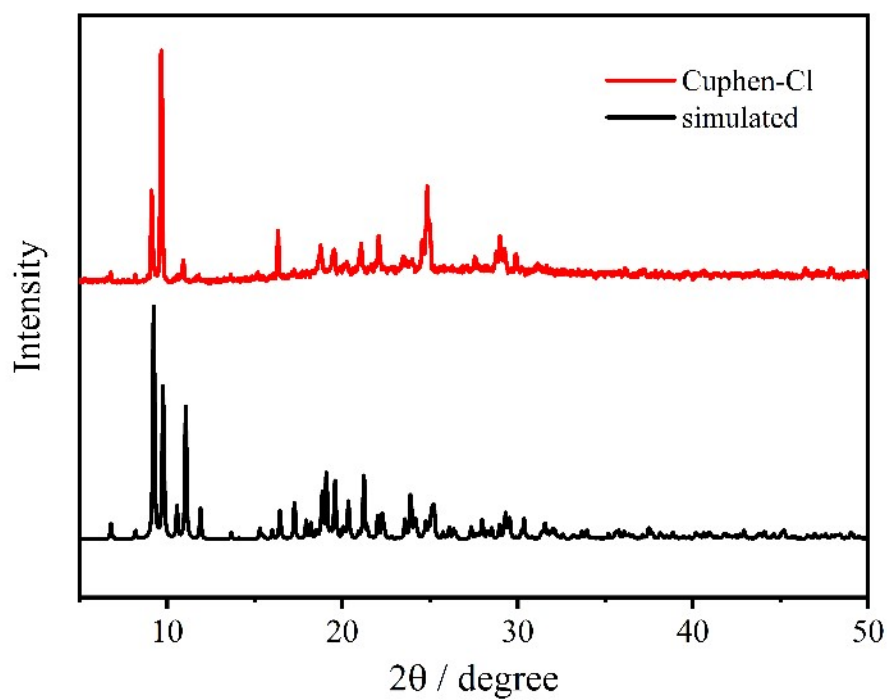

**Fig. S25** The PXRD patterns for complex **1a**: simulated from single crystal data (Black) and single phase polycrystalline sample (Red).

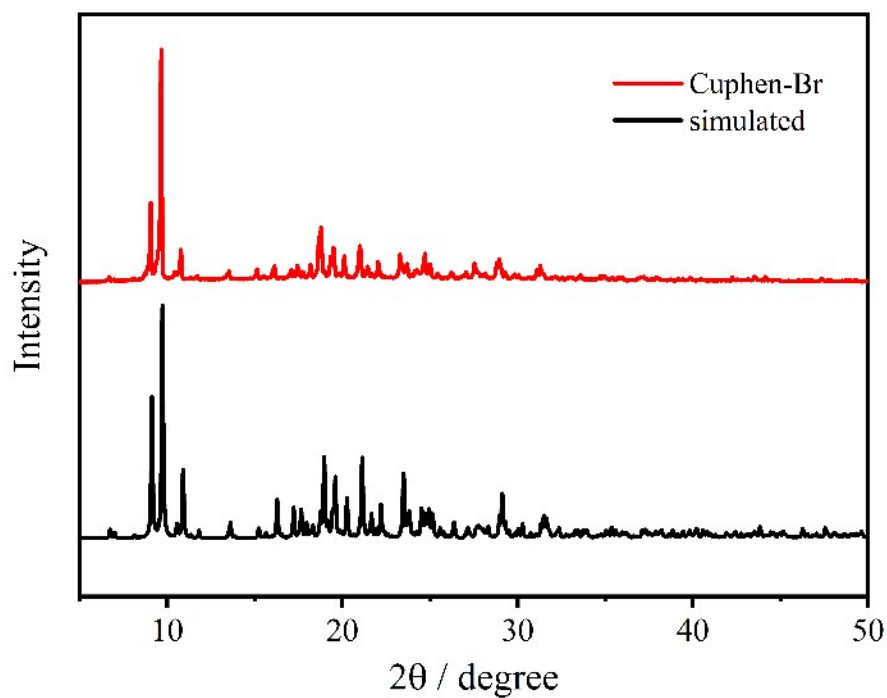

**Fig. S26** The PXRD patterns for complex **2a**: simulated from single crystal data (Black) and single phase polycrystalline sample (Red).

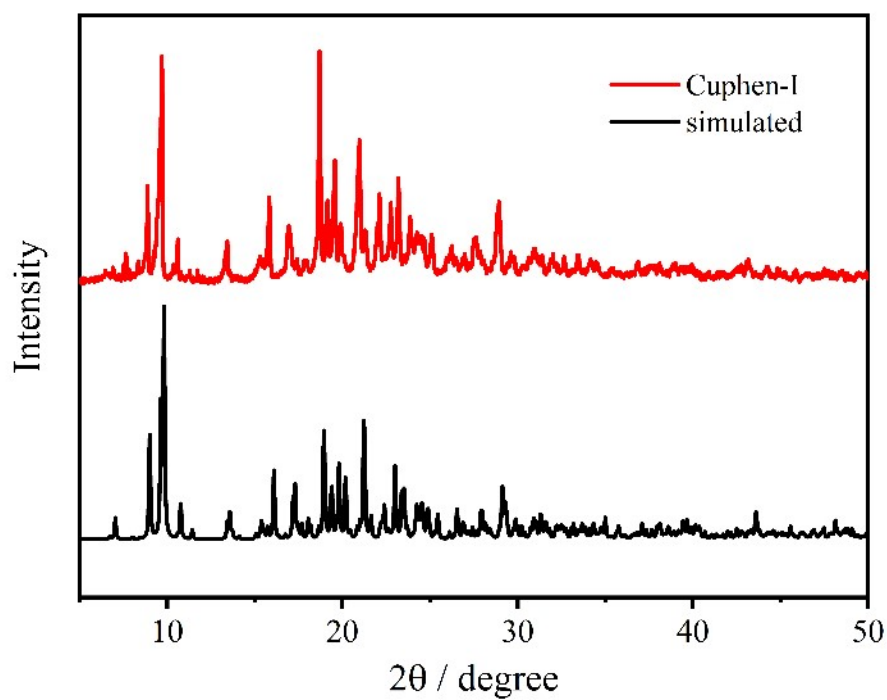

**Fig. S27** The PXRD patterns for complex **3a**: simulated from single crystal data (Black) and single phase polycrystalline sample (Red).

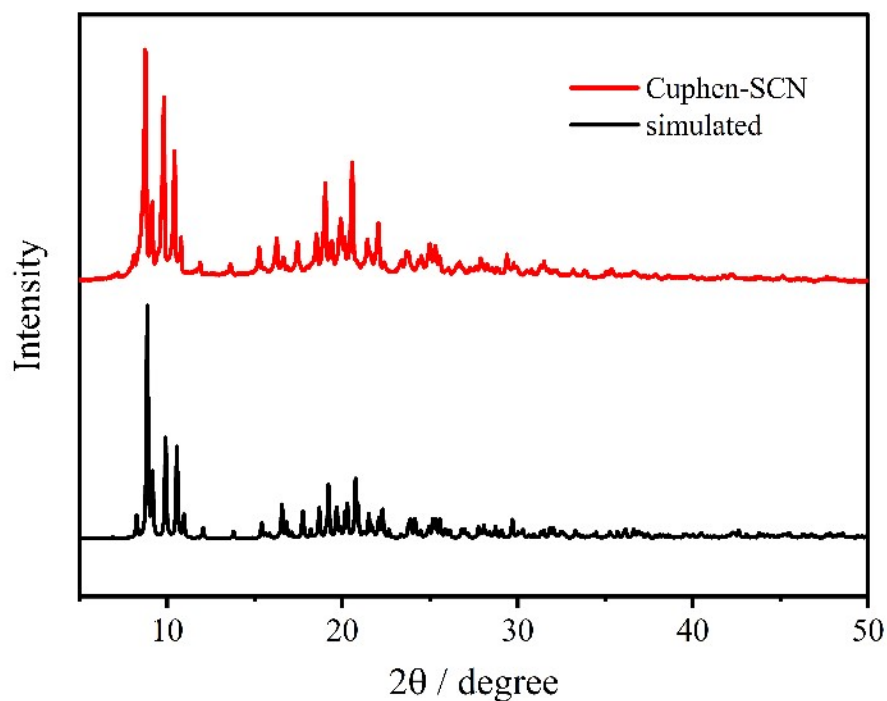

**Fig. S28** The PXRD patterns for complex **4a**: simulated from single crystal data (Black) and single phase polycrystalline sample (Red).



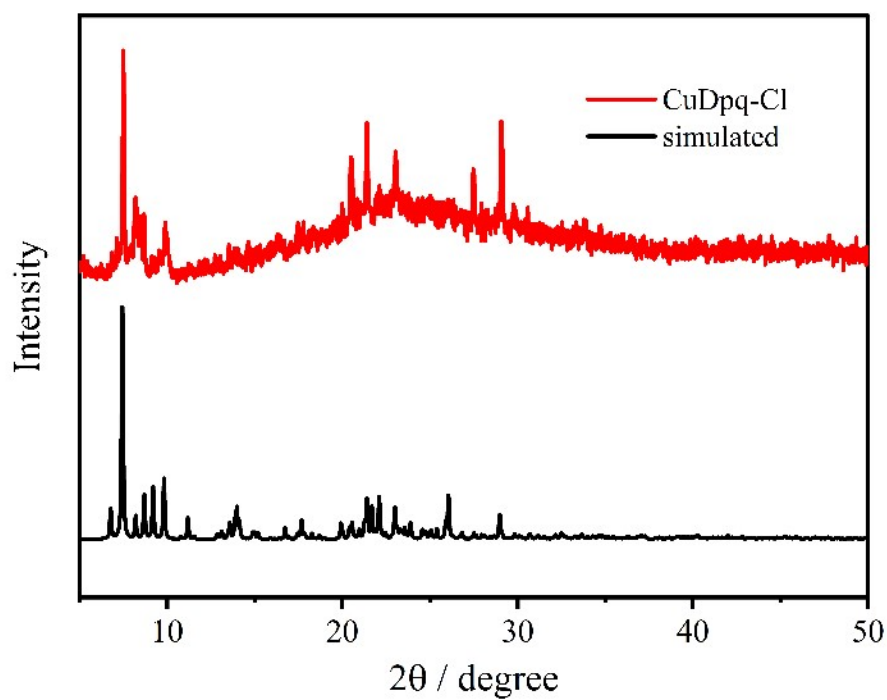

**Fig. S29** The PXRD patterns for complex **1b**: simulated from single crystal data (Black) and single phase polycrystalline sample (Red).

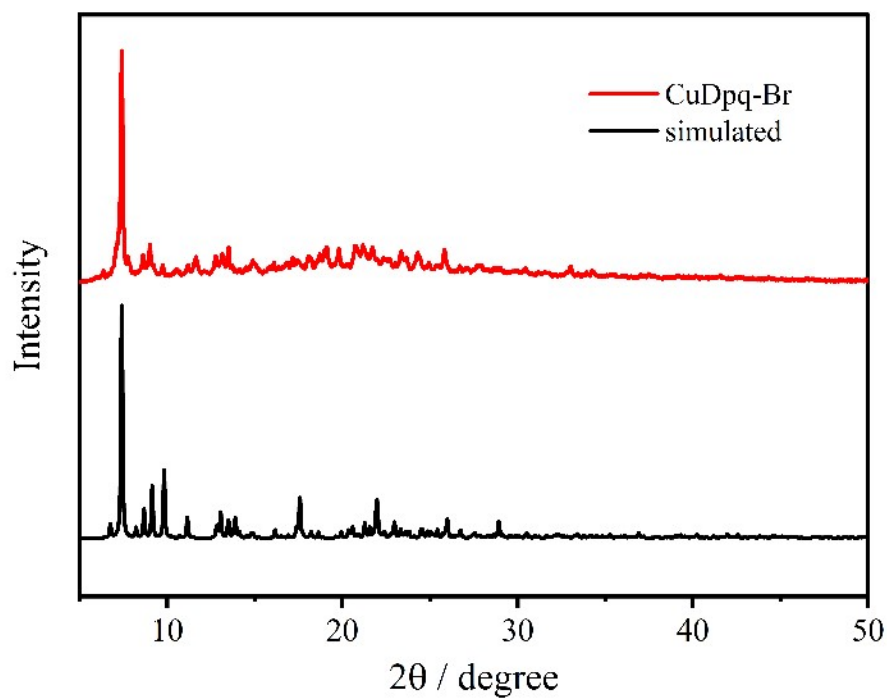

**Fig. S30** The PXRD patterns for complex **2b**: simulated from single crystal data (Black) and single phase polycrystalline sample (Red).

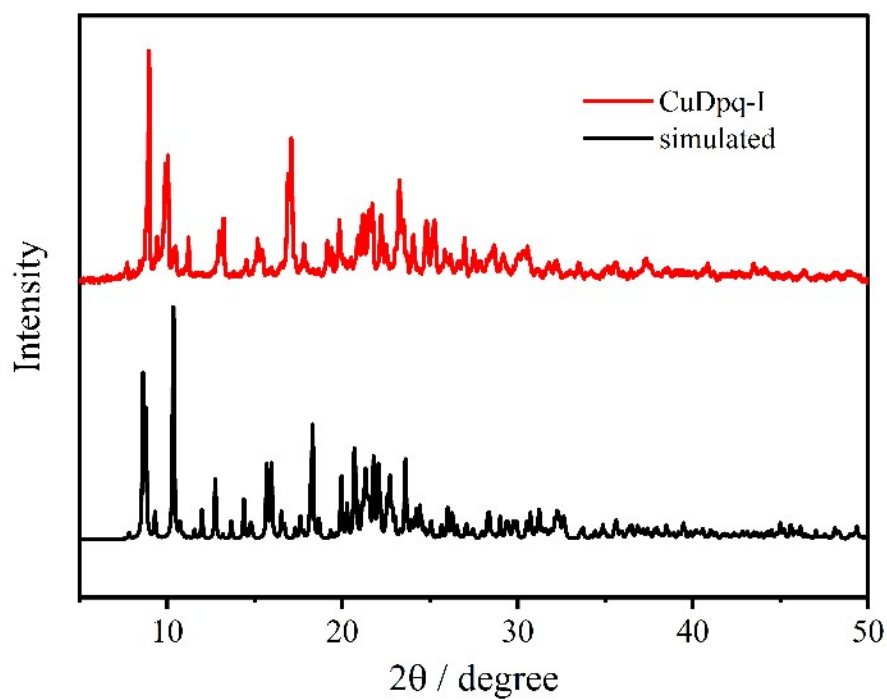

**Fig. S31** The PXRD patterns for complex **3b**: simulated from single crystal data (Black) and single phase polycrystalline sample (Red).

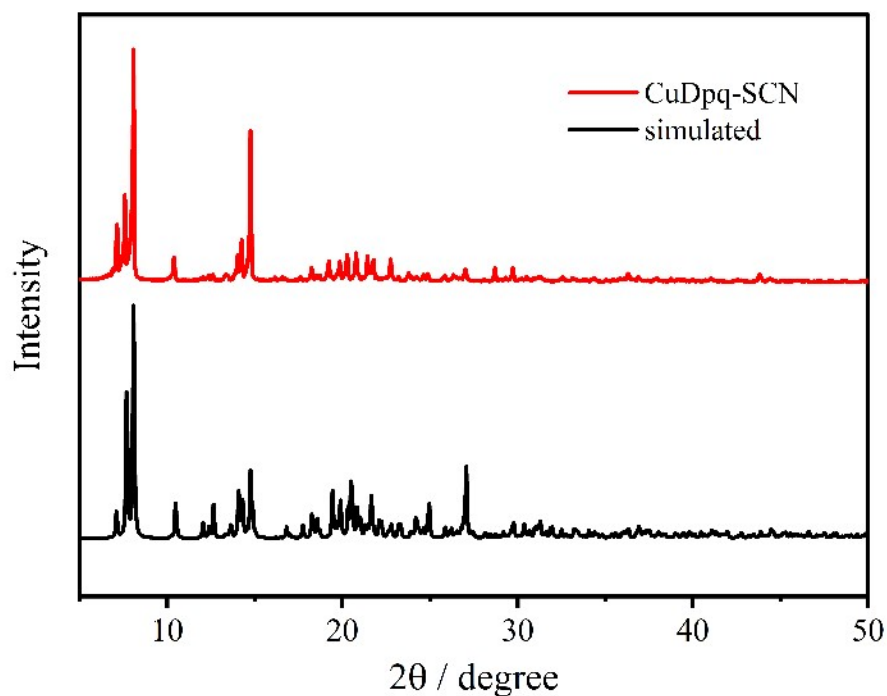

**Fig. S32** The PXRD patterns for complex **4b**: simulated from single crystal data (Black) and single phase polycrystalline sample (Red).

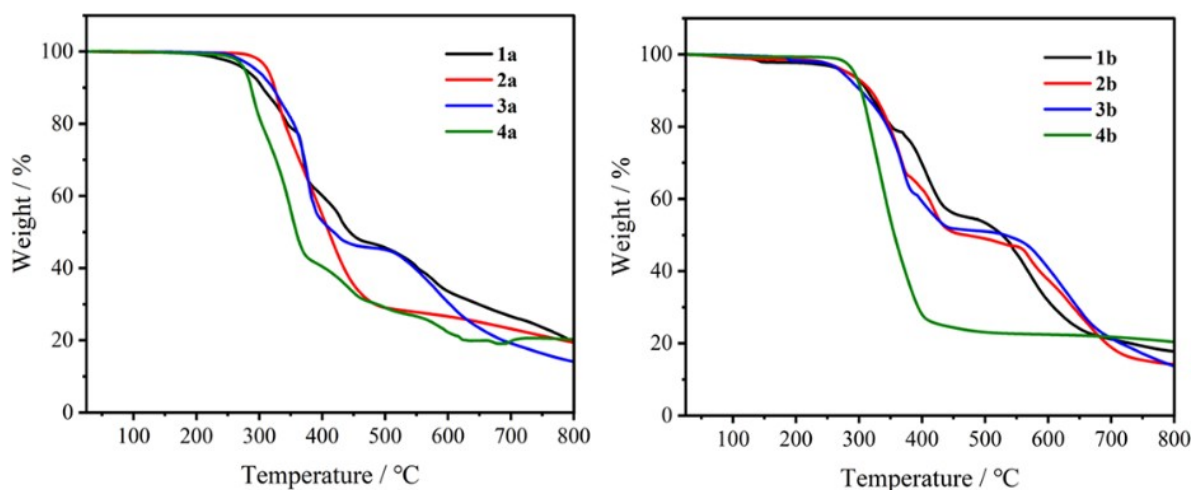

Fig. S33 The thermal stability curves for complexes **1a-4a** and **1b-4b**.

Table. S1 Selected bond lengths (Å) and angles (°) for complexes **1a-4a** and **1b-4b**.

| <b>1a</b>  |            |                 |             |
|------------|------------|-----------------|-------------|
| Cu(1)-P(1) | 2.2396(8)  | P(2)-Cu(1)-P(1) | 104.61(3)   |
| Cu(1)-P(2) | 2.2258(7)  | N(4)-Cu(1)-P(1) | 116.04(6)   |
| Cu(1)-N(4) | 2.044(2)   | N(4)-Cu(1)-P(2) | 110.13(6)   |
| Cu(1)-N(3) | 2.065(2)   | N(4)-Cu(1)-N(3) | 81.70(9)    |
|            |            | N(3)-Cu(1)-P(1) | 124.31(6)   |
|            |            | N(3)-Cu(1)-P(2) | 118.31(6)   |
| <b>2a</b>  |            |                 |             |
| Cu(1)-P(2) | 2.2396(6)  | P(1)-Cu(1)-P(2) | 104.71(2)   |
| Cu(1)-P(1) | 2.2271(6)  | N(2)-Cu(1)-P(2) | 125.66(6)   |
| Cu(1)-N(2) | 2.0611(19) | N(2)-Cu(1)-P(1) | 117.72(5)   |
| Cu(1)-N(1) | 2.062(2)   | N(2)-Cu(1)-N(1) | 81.46(8)    |
|            |            | N(1)-Cu(1)-P(2) | 115.68(6)   |
|            |            | N(1)-Cu(1)-P(1) | 109.44(6)   |
| <b>3a</b>  |            |                 |             |
| Cu(1)-P(1) | 2.2354(7)  | P(2)-Cu(1)-P(1) | 105.02(3)   |
| Cu(1)-P(2) | 2.2269(8)  | N(1)-Cu(1)-P(1) | 127.53(7)   |
| Cu(1)-N(1) | 2.050(2)   | N(1)-Cu(1)-P(2) | 116.88(7)   |
| Cu(1)-N(2) | 2.070(2)   | N(1)-Cu(1)-N(2) | 81.39(9)    |
|            |            | N(2)-Cu(1)-P(1) | 114.73(7)   |
|            |            | N(2)-Cu(1)-P(2) | 108.34(7)   |
| <b>4a</b>  |            |                 |             |
| Cu(1)-P(1) | 2.2306(5)  | P(1)-Cu(1)-P(2) | 105.026(18) |
| Cu(1)-P(2) | 2.2350(5)  | N(1)-Cu(1)-P(1) | 118.66(4)   |

|            |            |                 |           |
|------------|------------|-----------------|-----------|
| Cu(1)-N(1) | 2.0462(14) | N(1)-Cu(1)-P(2) | 126.66(4) |
| Cu(1)-N(2) | 2.0685(14) | N(1)-Cu(1)-N(2) | 81.61(6)  |
|            |            | N(2)-Cu(1)-P(1) | 107.71(4) |
|            |            | N(2)-Cu(1)-P(2) | 113.81(4) |
| <b>1b</b>  |            |                 |           |
| Cu(1)-P(1) | 2.2522(10) | P(2)-Cu(1)-P(1) | 105.31(4) |
| Cu(1)-P(2) | 2.2347(9)  | N(3)-Cu(1)-P(1) | 119.12(7) |
| Cu(1)-N(3) | 2.064(2)   | N(3)-Cu(1)-P(2) | 124.58(8) |
| Cu(1)-N(4) | 2.079(3)   | N(3)-Cu(1)-N(4) | 80.28(10) |
|            |            | N(4)-Cu(1)-P(1) | 107.49(8) |
|            |            | N(4)-Cu(1)-P(2) | 117.36(8) |
| <b>2b</b>  |            |                 |           |
| Cu(1)-P(2) | 2.2525(7)  | P(2)-Cu(1)-P(1) | 105.30(3) |
| Cu(1)-P(1) | 2.2414(7)  | N(1)-Cu(1)-P(2) | 119.72(6) |
| Cu(1)-N(1) | 2.066(2)   | N(1)-Cu(1)-P(1) | 124.31(6) |
| Cu(1)-N(2) | 2.086(2)   | N(1)-Cu(1)-N(2) | 80.09(8)  |
|            |            | N(2)-Cu(1)-P(2) | 108.11(6) |
|            |            | N(2)-Cu(1)-P(1) | 116.55(6) |
| <b>3b</b>  |            |                 |           |
| Cu(1)-P(1) | 2.2229(7)  | P(1)-Cu(1)-P(2) | 102.67(3) |
| Cu(1)-P(2) | 2.2515(7)  | N(2)-Cu(1)-P(1) | 127.83(6) |
| Cu(1)-N(2) | 2.078(2)   | N(2)-Cu(1)-P(2) | 115.91(6) |
| Cu(1)-N(1) | 2.056(2)   | N(1)-Cu(1)-P(1) | 123.32(7) |
|            |            | N(1)-Cu(1)-P(2) | 104.01(7) |
|            |            | N(1)-Cu(1)-N(2) | 80.89(9)  |
| <b>4b</b>  |            |                 |           |
| Cu(1)-P(1) | 2.2335(6)  | P(1)-Cu(1)-P(2) | 102.97(2) |
| Cu(1)-P(2) | 2.2494(6)  | N(1)-Cu(1)-P(1) | 116.58(5) |
| Cu(1)-N(1) | 2.0472(17) | N(1)-Cu(1)-P(2) | 123.12(5) |
| Cu(1)-N(2) | 2.0971(17) | N(1)-Cu(1)-N(2) | 80.22(7)  |
|            |            | N(2)-Cu(1)-P(1) | 123.39(5) |
|            |            | N(2)-Cu(1)-P(2) | 110.92(5) |

**Table. S2** Intermolecular weak interactions for complexes **1a-4a** and **1b-4b**.

|           | Cg(i)/C-H→Cg(i)/(A) | Cg                      | Symmetry code | Cg(A)/H...Cg(B) / Å |
|-----------|---------------------|-------------------------|---------------|---------------------|
| <b>1a</b> | Cg(10) ...Cg(10)    | C35-C36-C39-C40-C38-C37 | -x, -y, 1-z   | 3.9928              |
|           | C7-H7A→Cg(3)        | N2-C1-C2-C3-C4-C5       | 1-x, 1-y, -z  | 2.95                |
|           | C24-H24→Cg(10)      | C35-C36-C39-C40-C38-C37 | -x, 1-y, 1-z  | 2.96                |

|           |                              |                         |                      |        |
|-----------|------------------------------|-------------------------|----------------------|--------|
|           | C34-H34→Cg(7)                | C14-C15-C16-C17-C18-C19 | -x, -y, 1-z          | 2.89   |
|           | C15-H15…C11                  | /                       | /                    | 2.77   |
|           | C29-H29…C11                  | /                       | 1-x, 1-y, 1-z        | 2.77   |
|           | C43-H43…C11                  | /                       | /                    | 2.68   |
| <b>2a</b> | Cg(6)…Cg(6)                  | C4-C5-C6-C7-C12-C11     | 1-x, 1-y, 1-z        | 3.9368 |
|           | C8-H8→Cg(10) <sup>i</sup>    | C38-C39-C40-C41-C42-C43 | 1-x, 1-y, 1-z        | 2.93   |
|           | C18-H18A→Cg(5) <sup>ii</sup> | N3-C13-C14-C15-C16-C17  | -x, -y, 2-z.         | 2.99   |
|           | C1-H1…Br1 <sup>i</sup>       | /                       | -x, 1-y, 1-z         | 2.84   |
|           | C28-H28A…Br1                 | /                       | x, -1+y, z           | 2.93   |
|           | C43--H43…Br1                 |                         | -x, 1-y, 1-z         | 2.92   |
| <b>3a</b> | Cg(6)…Cg(6)                  | C4-C5-C6-C7-C11-C12     | 1-x, 1-y, 1-z        | 3.8269 |
|           | C8-H8→Cg(10) <sup>i</sup>    | C38-C39-C40-C41-C42-C43 | 1-x, 1-y, 1-z        | 2.92   |
|           | C14-H14→Cg(8)                | C19-C20-C21-C22-C23-C24 | 1-x, -y, 1-z         | 2.97   |
|           | C1-H1…I1                     | /                       | /                    | 3.01   |
| <b>4a</b> | Cg(6)…Cg(6)                  | C4-C5-C6-C7-C12-C11     | 1-x, -y, -z          | 3.5830 |
|           | C12-H12→Cg(9) <sup>i</sup>   | C32-C33-C34-C35-C36-C37 | 1-x, -y, -z          | 2.93   |
|           | C18-H18A→Cg(5) <sup>ii</sup> | N4-C13-C14-C15-C16-C17  | -x, 1-y, 1-z         | 2.99   |
|           | C23-H23→Cg(8) <sup>iii</sup> | C25-C26-C27-C28-C29-C30 | 1-x, 1-y, -z         | 2.83   |
|           | C3-H3…N5                     | /                       | 1-x, -y, -z          | 2.36   |
|           | C15-H15…S1                   | /                       | 1-x, 1-y, 1-z        | 2.78   |
|           | C22-H22…S1                   | /                       | 1-x, 1-y, -z         | 2.86   |
| <b>1b</b> | O1-H1-C11                    | /                       | /                    | 2.36   |
|           | O2-H2-C11                    | /                       | /                    | 2.29   |
|           | O3-H3-C11                    | /                       | 1-x, 1-y, 1-z        | 2.28   |
|           | C32-H32…O2                   | /                       | -1+x, y, z           | 2.33   |
|           | C33-H33…O1                   | /                       | -1+x, y, z           | 2.59   |
|           | C41-H41…O3                   | /                       | 1/2+x, 1/2-y, 1/2+z  | 2.60   |
| <b>2b</b> | C42-H42…O46                  | /                       | /                    | 2.56   |
|           | C43-H43…O47                  | /                       | /                    | 2.26   |
|           | O3-H3A…Br1                   | /                       | -1/2+x, 3/2-y, 1/2+z | 2.68   |
|           | O46-H46A…Br1                 | /                       | /                    | 2.55   |
|           | O47-H47…Br1                  | /                       | /                    | 2.56   |
| <b>3b</b> | C13-H13→Cg(10) <sup>i</sup>  | C34-C35-C36-C37-C38-C39 | 1-x, 2-y, 1-z        | 2.86   |
|           | C17-H17→Cg(8) <sup>ii</sup>  | C21-C22-C23-C24-C25-C26 | 1+x, y, z            | 2.79   |
|           | C24-H24→Cg(6)                | N6-C15-C16-C17-C18-C19  | 1-x, 2-y, -z         | 2.90   |
|           | C1-H1…I1 <sup>i</sup>        | /                       | /                    | 3.00   |
| <b>4b</b> | Cg(7)…Cg(7)                  | C4-C5-C6-C7-C12-C11     | 1-x, 1-y, 1-z        | 3.9801 |
|           | C14-H14→Cg(10) <sup>i</sup>  | C34-C35-C36-C37-C38-C39 | 1-x, 1-y, 1-z        | 2.89   |

|                            |   |               |      |
|----------------------------|---|---------------|------|
| C33-H33A...S1 <sup>i</sup> | / | x, -1+y, z    | 2.78 |
| C42-H42...N7 <sup>ii</sup> | / | 1-x, 1-y, 1-z | 2.60 |

**Table. S3** Fluorescence data for ligands phen, Dpq and bdppmapy.

| ligands  | $\lambda_{ex}$ / nm | $\lambda_{em}$ / nm |
|----------|---------------------|---------------------|
| phen     | 365                 | 384                 |
| Dpq      | 382                 | 419                 |
| bdppmapy | 380                 | 433                 |

**Table. S4** Energy, oscillator strength and major contribution of the calculated transitions for complexes **3a** and **3b**

| Excited state                                   | Energy                 | Oscillator strength | Contribution %                    |
|-------------------------------------------------|------------------------|---------------------|-----------------------------------|
| [Cu(bdppmapy)(phen)] <sup>+</sup><br>absorbtion | 5.1490 eV<br>240.79 nm | 0.1695              | HOMO-17 -> LUMO 9.57              |
|                                                 |                        |                     | HOMO-17 -> LUMO+2 3.48            |
|                                                 |                        |                     | HOMO-9 -> LUMO+2 3.16             |
|                                                 |                        |                     | <b>HOMO-8 -&gt; LUMO+2 46.32</b>  |
|                                                 |                        |                     | HOMO-5 -> LUMO+2 9.11             |
|                                                 |                        |                     | HOMO-4 -> LUMO+2 3.96             |
| [Cu(bdppmapy)(phen)] <sup>+</sup><br>emission   | 2.7530 eV<br>450.36 nm | 0.0541              | HOMO-5 -< LUMO 4.47               |
|                                                 |                        |                     | <b>HOMO-3 -&lt; LUMO 59.03</b>    |
|                                                 |                        |                     | HOMO-2 -< LUMO 23.19              |
|                                                 |                        |                     | HOMO-1 -< LUMO+1 2.16             |
|                                                 |                        |                     | HOMO -< LUMO+2 3.82               |
| [Cu(bdppmapy)(Dpq)] <sup>+</sup><br>absorbtion  | 4.8957 eV<br>253.25 nm | 0.5546              | HOMO-17 -> LUMO 9.29              |
|                                                 |                        |                     | <b>HOMO-17 -&gt; LUMO+2 39.42</b> |
|                                                 |                        |                     | HOMO-16 -> LUMO 12.81             |
|                                                 |                        |                     | HOMO-16 -> LUMO+2 12.76           |
|                                                 |                        |                     | HOMO-3 -> LUMO+4 2.88             |
| [Cu(bdppmapy)(Dpq)] <sup>+</sup><br>emission    | 2.6185 eV<br>473.49 nm | 0.0445              | HOMO-3 -< LUMO 10.14              |
|                                                 |                        |                     | <b>HOMO-2 -&lt; LUMO 70.56</b>    |
|                                                 |                        |                     | HOMO-1 -< LUMO 12.08              |
